# Supplementary material
Source: PubMed Central journal article supplement (PMC3533293)
Supplement: JCI64650sd.pdf [file JCI64650sd.pdf]

## Supplemental Figure 1

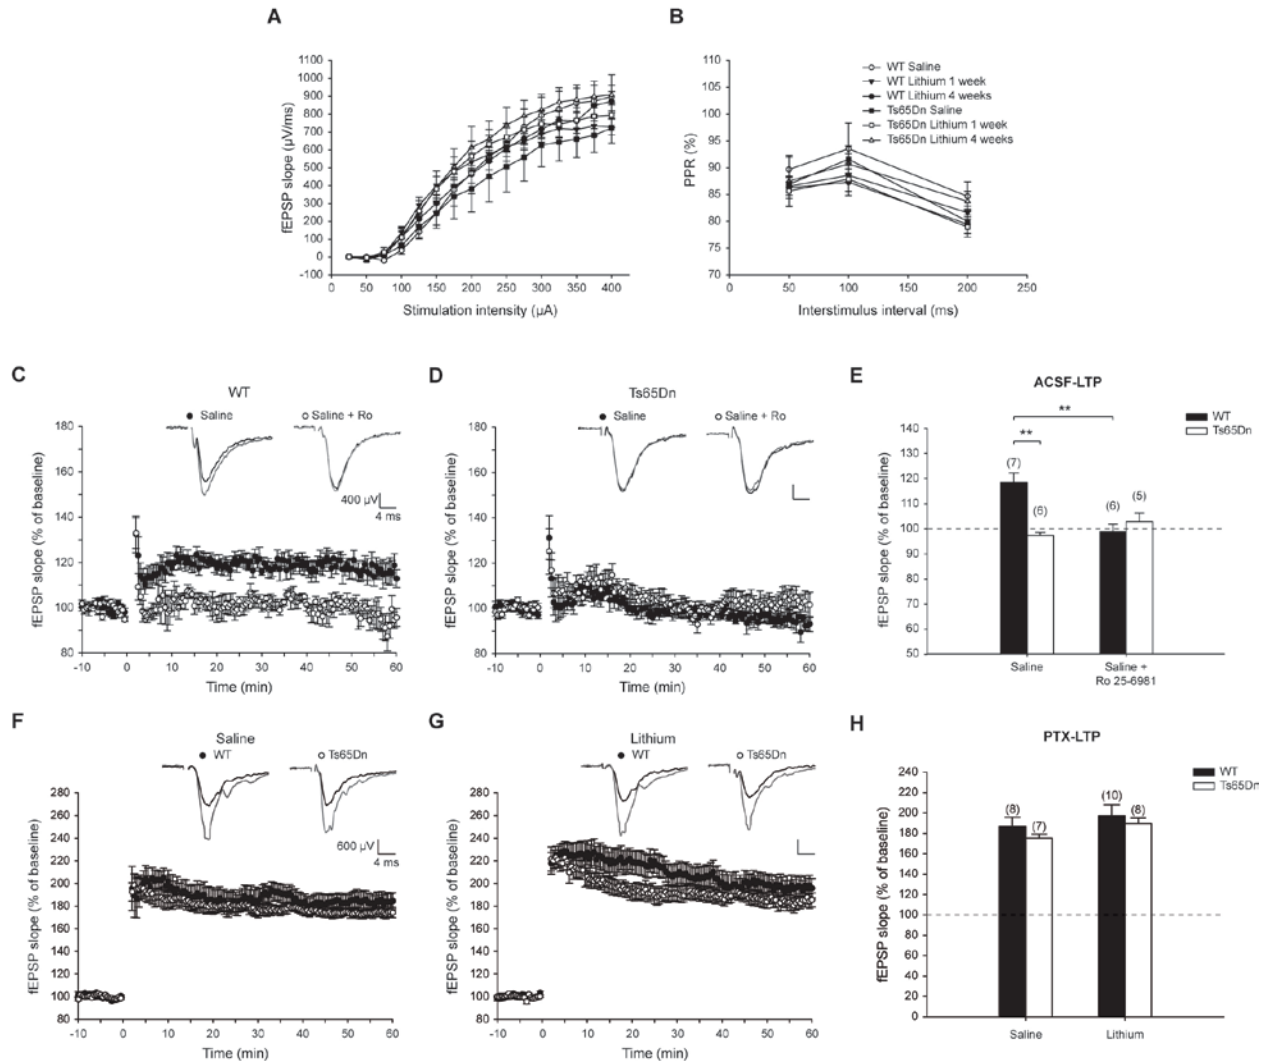

**Supplemental Figure 1. – (A-B) Basal synaptic transmission was similar in the DG of saline- or lithium-treated Ts65Dn and WT mice. (A)** Input-output (I/O) relationships were similar across experimental groups for stimulus intensities ranging from 25 to 400  $\mu$ A (25  $\mu$ A step), indicating similar pre-synaptic recruitment of afferent fibers and comparable post-synaptic responses. 2-way ANOVA F ratio and P values were: genotype [ $F_{1,34}=1.739$ ,  $P=0.196$ ] at 50  $\mu$ A, treatment [ $F_{2,34}=1.745$ ,  $P=0.189$ ] at 125  $\mu$ A, genotype x treatment [ $F_{2,34}=2.458$ ,  $P=0.101$ ] at 350  $\mu$ A, or higher. **(B)** The paired-pulse ratio (PPR) was not significantly different across groups for inter-stimulus intervals of 50, 100 and 200 msec. 2-way ANOVA, 50 msec: genotype [ $F_{1,34}=0.122$ ,  $P=0.729$ ], treatment [ $F_{2,34}=0.265$ ,  $P=0.769$ ], genotype x treatment [ $F_{2,34}=0.259$ ,  $P=0.774$ ]. 2-way ANOVA, 100 msec: genotype [ $F_{1,34}=0.014$ ,  $P=0.907$ ], treatment [ $F_{2,34}=1.417$ ,  $P=0.256$ ], genotype x treatment [ $F_{2,34}=0.667$ ,  $P=0.520$ ]. 2-way ANOVA, 200 msec: genotype [ $F_{1,34}=0.375$ ,  $P=0.544$ ], treatment [ $F_{2,34}=0.475$ ,  $P=0.626$ ], genotype x treatment [ $F_{2,34}=2.862$ ,  $P=0.071$ ]. **(C-E)** The NR2B antagonist Ro25-6981 inhibited LTP induction in the DG of saline-treated WT mice. Tetanic stimulation induced LTP in slices obtained from saline-treated WT (**C**,  $p<0.001$  vs baseline), but not Ts65Dn mice (**D**;  $p=0.190$  vs baseline). Application of the NR2B antagonist Ro25-6981 (1.5  $\mu$ M)

prevented ACSF-LTP induction in WT slices (**C**;  $p=0.708$  vs baseline), but was ineffective in Ts65Dn slices (**D**;  $p=0.690$  vs baseline). (**E**) Quantification of ACSF-LTP induction in the DG at 40-45 min after tetanic stimulation. 2-way ANOVA: genotype [ $F_{1,23}=8.199$ ,  $P=0.001$ ], treatment [ $F_{1,23}=5.516$ ,  $P=0.029$ ], genotype x treatment [ $F_{1,23}=17.443$ ,  $P<0.001$ ]. \*\* $p<0.01$  Tukey *post hoc* test. **(F-H) LTP induction in presence of PTX was similar in Ts65Dn and WT mice.** fEPSPs were recorded in presence of PTX (100  $\mu$ M) in slices from Ts65Dn and WT mice fed either with normal or lithium-containing diet for 4 weeks. Tetanic stimulation in presence of PTX elicited LTPs of similar amplitude in both saline-treated (**F**) and lithium-fed (**G**) Ts65Dn mice and WT littermates (**F-G**;  $p<0.001$  vs baseline) (**H**) Quantification of PTX-LTP induction at 40-45 min after tetanic stimulation. 2-way ANOVA: genotype [ $F_{1,29}=1.346$ ,  $P=0.256$ ], treatment [ $F_{1,29}=2.197$ ,  $P=0.149$ ], genotype x treatment [ $F_{1,29}=0.0542$ ,  $P=0.818$ ]. The numbers in parentheses indicate the number of brain slices recorded for each experimental group. Insets in panels C-D and F-G show representative fEPSPs traces recorded 5 min before (black) and 45 min after (gray) LTP induction.

## Supplemental Figure 2

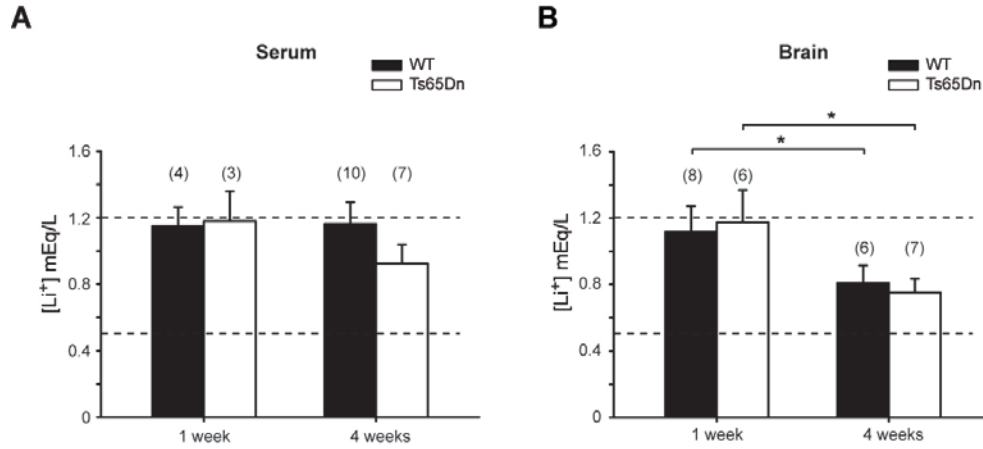

**Supplemental Figure 2. – Serum and brain lithium concentrations in WT and Ts65Dn mice. (A)** The serum concentration of lithium was assessed after 1 or 4 weeks of treatment. No statistical difference was detected between groups. 2-way ANOVA: genotype [ $F_{1,20}=0.412$ ,  $P=0.528$ ], treatment [ $F_{1,20}=0.554$ ,  $P=0.466$ ], genotype x treatment [ $F_{1,20}=0.686$ ,  $P=0.417$ ]. **(B)** The brain concentration of lithium was assessed after 1 or 4 weeks of treatment. Lithium concentration was slightly decreased in both WT and Ts65Dn brains after 4 weeks in comparison with 1 week of treatment, but remains in the range achieved by lithium therapy in humans (0.5-1.2 mEq/L; dashed lines in both A and B panels). 2-way ANOVA: genotype [ $F_{1,23}>0.001$ ,  $P=0.999$ ], treatment [ $F_{1,23}=6.841$ ,  $P=0.015$ ], genotype x treatment [ $F_{1,23}=0.161$ ,  $P=0.692$ ]. \* $p<0.05$  Tukey *post hoc* test. The numbers in parentheses indicate the number of samples analyzed for each experimental group.

Supplemental Figure 3

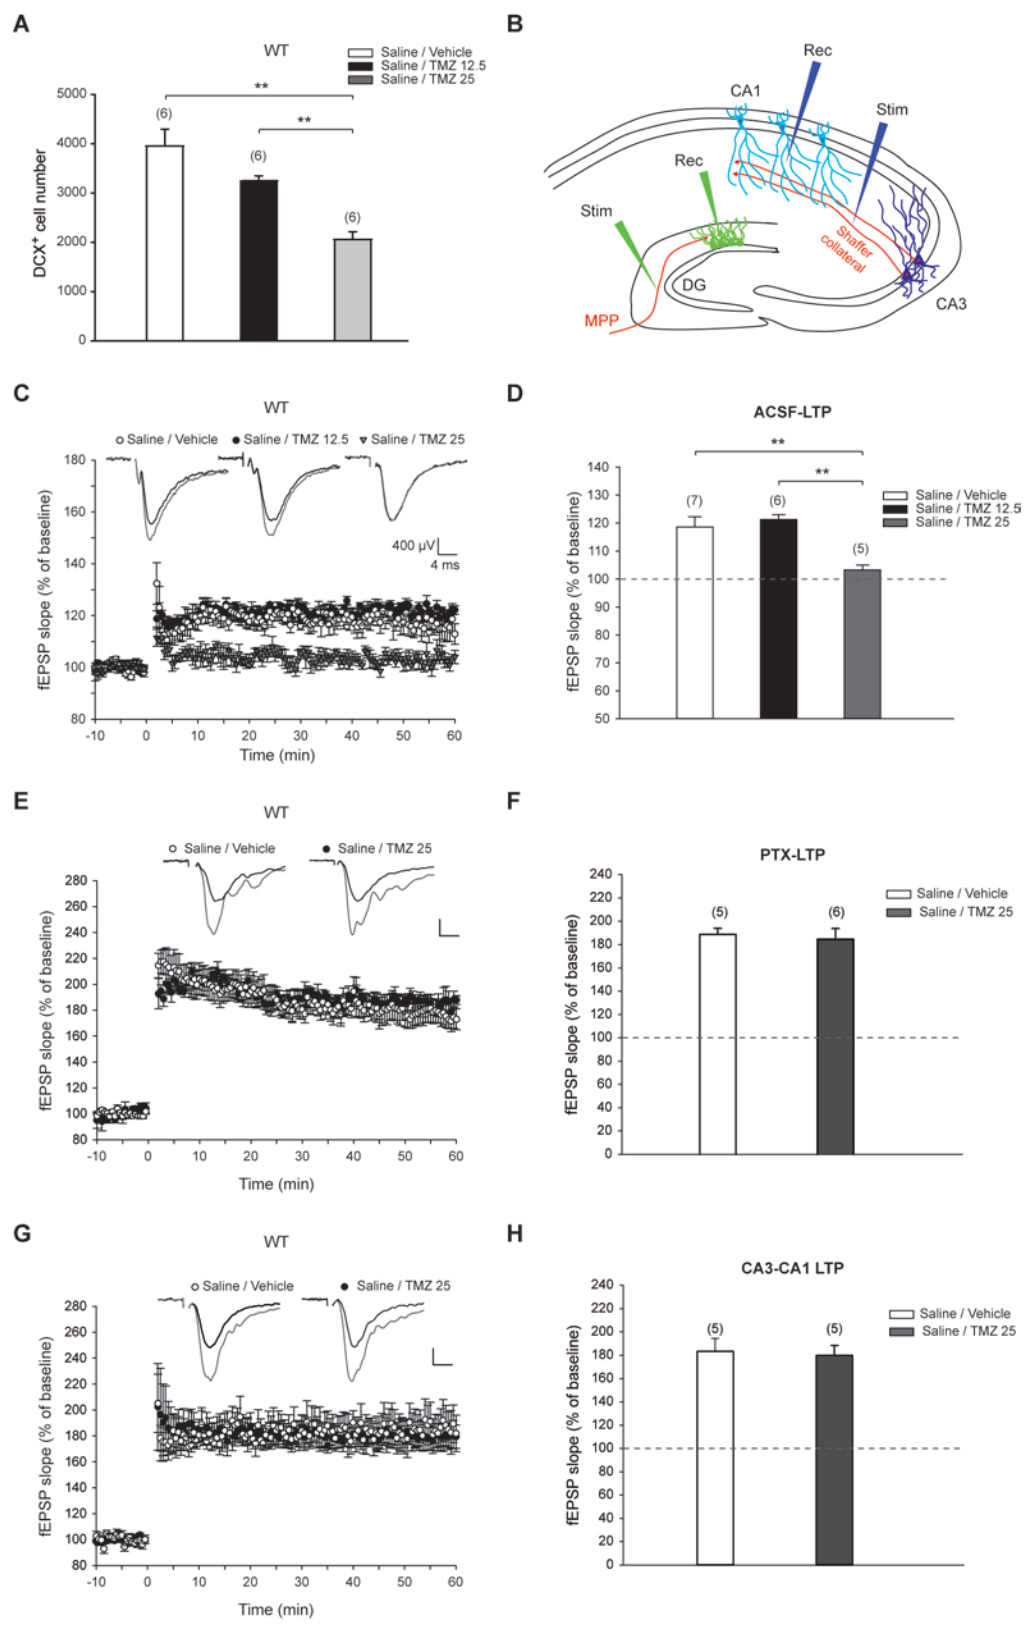

**Supplemental Figure 3. – TMZ reduced the number of newborn neurons and blocked neurogenesis-dependent plasticity in the DG of WT mice without altering the functional properties of other hippocampal neurons. (A)** Quantitative analysis of DCX<sup>+</sup> newborn neurons in the DG of WT mice treated with 12.5 or 25 mg/Kg of TMZ (see Methods). 1-way ANOVA: [ $F_{2,15}=18.210$ ,  $P<0.001$ ], \*\* $p<0.01$  Tukey *post hoc* test. **(B)** Position of the stimulating and recording electrodes for LTP induction in the DG (green) and CA3-CA1 region (blue). **(C)** TMZ prevented neurogenesis-dependent LTP (ACSF-LTP) induction in slices obtained from WT mice treated with 25 mg/Kg ( $p=0.141$  vs baseline), but not with 12.5 mg/Kg of TMZ ( $p<0.001$ ) or saline/vehicle ( $p<0.001$ ). **(D)** Quantification of the extent of ACSF-LTP elicited in the DG of mice treated with or without TMZ. 1-way ANOVA: [ $F_{2,15}=10.869$ ,  $P=0.001$ ], \*\* $p<0.01$  Tukey *post hoc* test. **(E)** Potentiation of mature DG neurons (PTX-LTP) was similar in slices from WT mice treated with either vehicle or 25 mg/Kg TMZ ( $p<0.001$  vs baseline for each group). **(F)** Quantification of PTX-LTP induction 40-45 min after tetanic stimulation in the DG.  $P=0.724$  Student t-test. **(G)** LTP at Shaffer collateral-CA1 synapses (CA3-CA1 LTP) was similar in slices from WT mice treated with vehicle or 25 mg/Kg TMZ ( $p<0.001$  vs baseline for each group). **(H)** Quantification of CA3-CA1 LTP induction 40-45 min after stimulation.  $P=0.821$  Student t-test. The numbers in parentheses indicate the number of brain slices recorded for each experimental group. Insets in panels C, E and G show representative fEPSPs traces recorded 5 min before (black) and 45 min after (gray) LTP induction.

Supplemental Figure 4

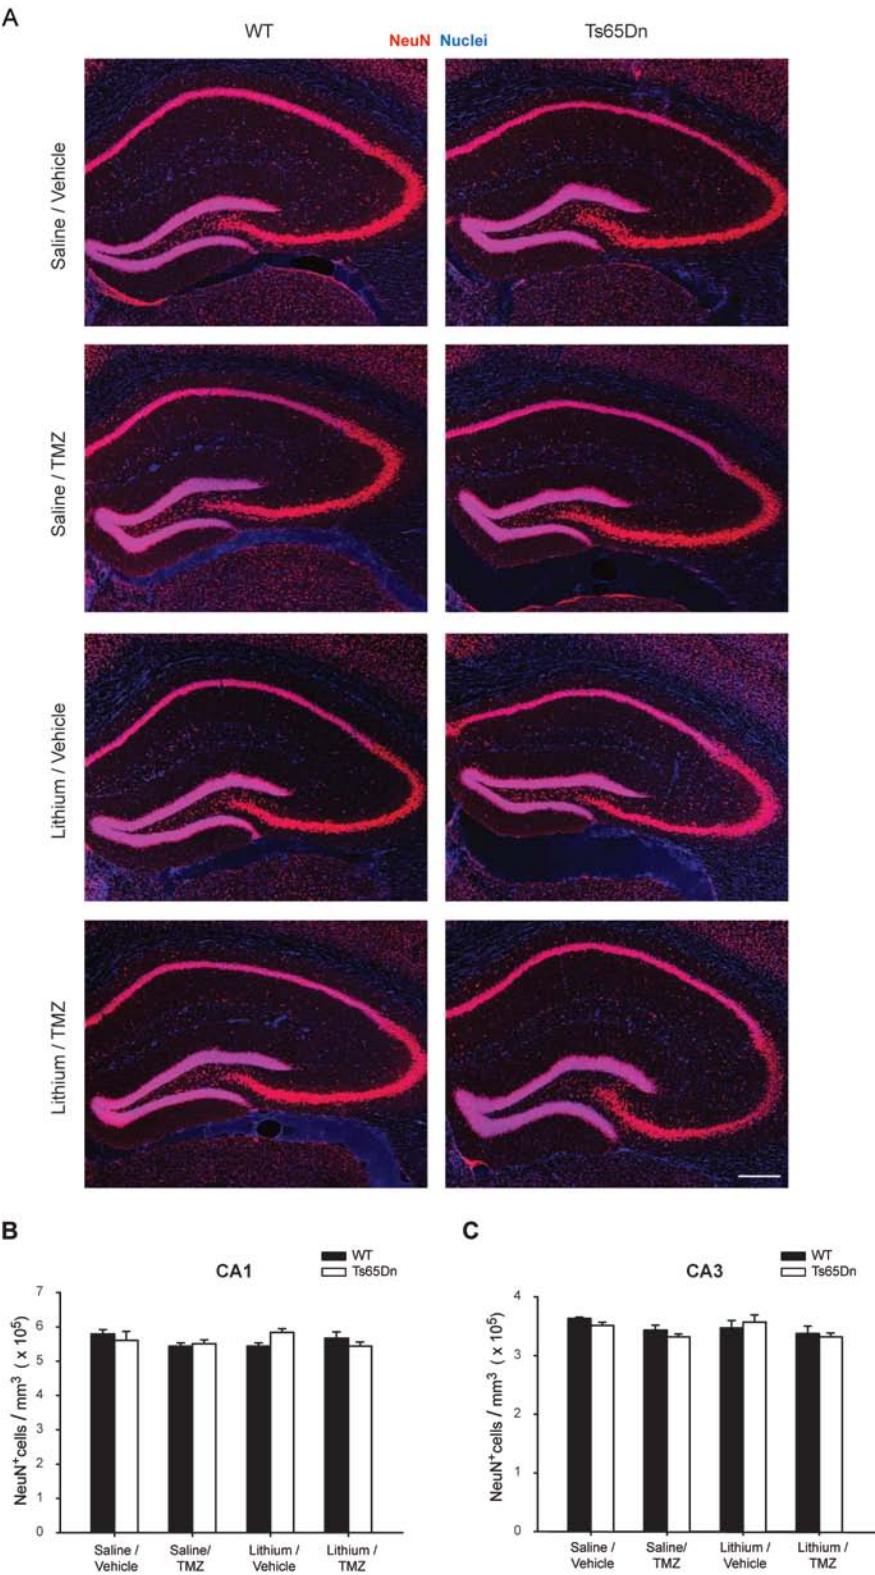

**Supplemental Figure 4. – TMZ treatment did not alter neuronal density in non-neurogenic hippocampal regions (A)** Representative confocal images showing NeuN immunoreactivity (red). Nuclei were counterstained with Hoechst-33342 (blue). Scale bar, 250  $\mu$ m. **(B)** Neuronal density in the CA1 region was similar in all experimental groups. 2-way ANOVA: genotype [ $F_{1,24}=0.011$ ,  $P=0.917$ ], treatment [ $F_{3,24}=0.892$ ,  $P=0.459$ ], genotype x treatment [ $F_{3,24}=1.919$ ,  $P=0.153$ ]. **(C)** Neuronal density in the CA3 region was similar in all experimental groups. 2-way ANOVA: genotype [ $F_{1,24}=0.725$ ,  $P=0.403$ ], treatment [ $F_{1,24}=3.652$ ,  $P=0.027$ ], genotype x treatment [ $F_{2,24}=0.783$ ,  $P=0.515$ ].

## Supplemental Figure 5

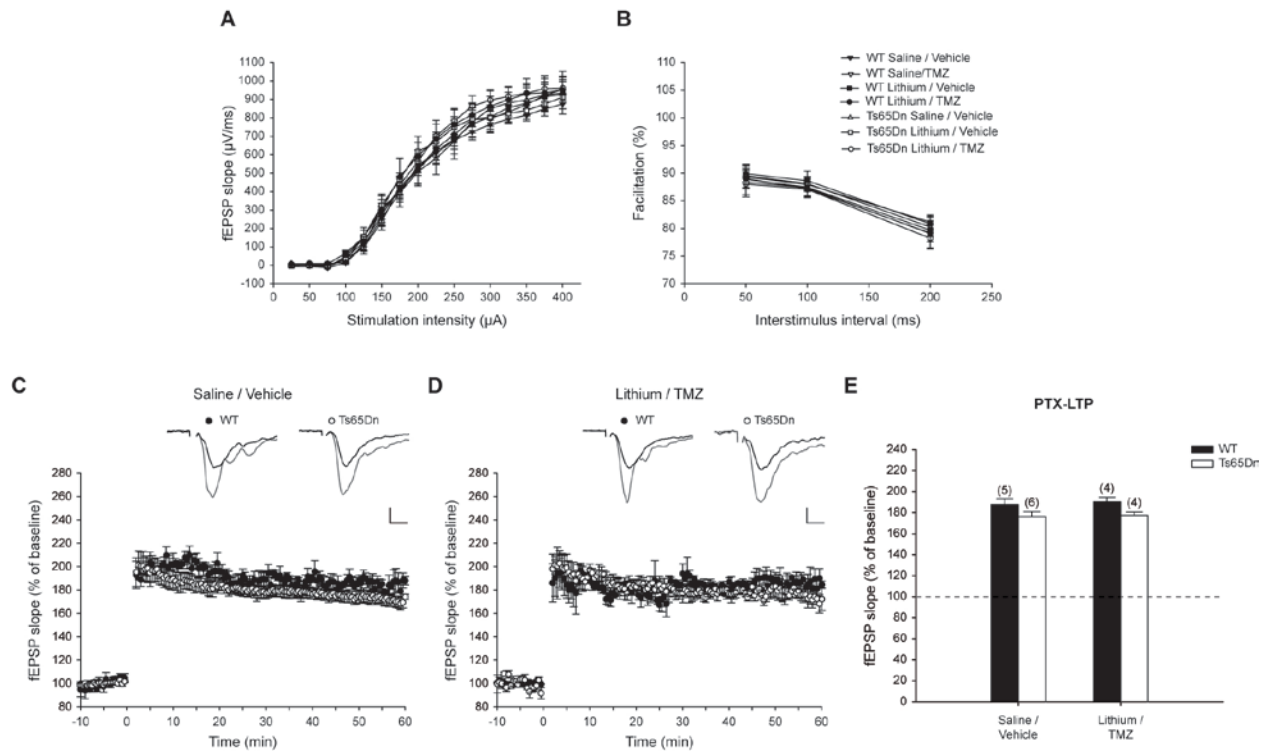

**Supplemental Figure 5. - (A-B) Basal synaptic transmission was not altered by TMZ treatment.** fEPSPs were elicited by stimulation of the MPP. **(A)** I/O relationships were similar across all groups for stimulus intensities ranging from 25 to 400  $\mu$ A (25  $\mu$ A step). 2-way ANOVA F ratio and P values were: [ $F_{1,36}=1.687$ ,  $P=0.203$ ] at 50  $\mu$ A, treatment [ $F_{2,36}=2.234$ ,  $P=0.123$ ] at 75  $\mu$ A, genotype x treatment [ $F_{2,36}=1.419$ ,  $P=0.256$ ] at 100  $\mu$ A or higher. **(B)** PPR was not significantly different across groups at interstimulus intervals of 50, 100 and 200 msec. 2-way ANOVA for 50 msec: genotype [ $F_{1,36}=0.215$ ,  $P=0.646$ ], treatment [ $F_{2,36}=0.081$ ,  $P=0.992$ ], genotype x treatment [ $F_{2,36}=0.150$ ,  $P=0.861$ ]. 2-way ANOVA for 100 msec: genotype [ $F_{1,36}=0.173$ ,  $P=0.680$ ], treatment [ $F_{2,36}=0.091$ ,  $P=0.913$ ], genotype x treatment [ $F_{2,36}=0.185$ ,  $P=0.832$ ]. 2-way ANOVA for 200 msec: genotype [ $F_{1,36}=1.411$ ,  $P=0.243$ ], treatment [ $F_{2,36}=0.496$ ,  $P=0.613$ ], genotype x treatment [ $F_{2,36}=0.303$ ,  $P=0.740$ ]. **(C-E) LTP of mature DG neurons (PTX-LTP) was unchanged after TMZ treatment.** Tetanic stimulation of slices in presence of PTX (100  $\mu$ M) elicited similar LTP in either WT or Ts65Dn ( $p<0.001$  vs baseline for each group) mice treated with vehicle (C) or co-administered with lithium and TMZ (D). Insets in C and D show representative fEPSP traces recorded 5 min before (black) and 45 min after (gray) LTP induction. **(E)** Quantification of LTP induction in presence of PTX at 40-45 min after tetanic stimulation. 2-way ANOVA: genotype [ $F_{1,15}=6.743$ ,  $P=0.020$ ], treatment [ $F_{1,15}=0.160$ ,  $P=0.695$ ], genotype x treatment [ $F_{2,15}=0.016$ ,  $P=0.900$ ]. The numbers in parentheses indicate the number of brain slices recorded for each experimental group.

## Supplemental Figure 6

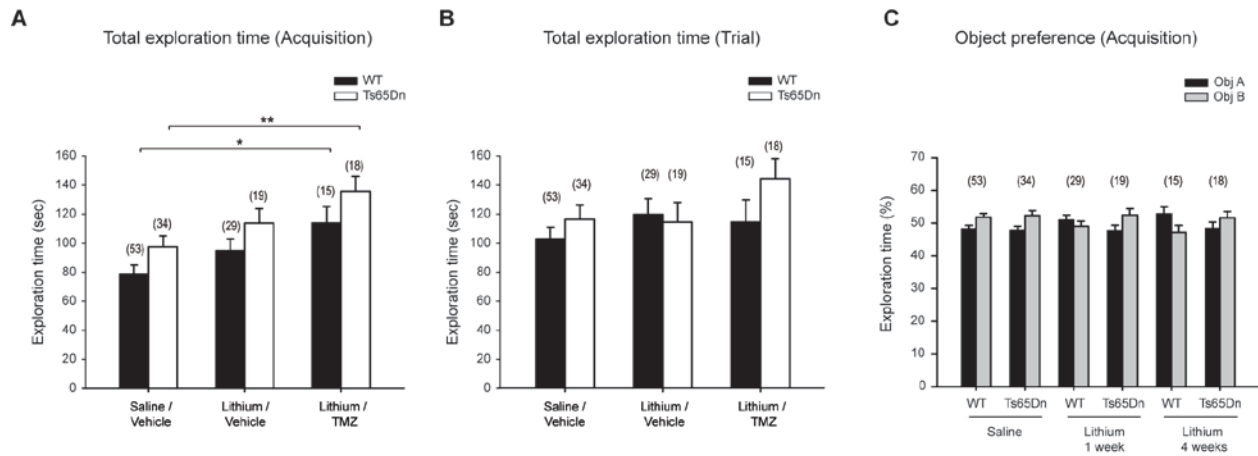

**Supplemental Figure 6. - Total object exploration time and object preference in the object location (OL) test.** Ts65Dn and WT mice were fed with either normal or lithium-containing diet for 4 weeks and concomitantly treated with TMZ or vehicle. **(A)** The total exploration time during the acquisition phase of the OL test was similar in saline/vehicle and saline/lithium treated Ts65Dn and WT mice, but was increased in both WT and Ts65Dn mice treated with TMZ. 2-way ANOVA: genotype [ $F_{1,162}=7.213$ ,  $P=0.008$ ], treatment [ $F_{2,1162}=8.636$ ,  $P<0.001$ ], genotype x treatment [ $F_{2,162}=0.017$ ,  $P=0.983$ ]. \* $p<0.05$ , \*\* $p<0.01$  Tukey *post hoc* test. **(B)** The total object exploration time in the OL trial phase was not significantly different across genotype and treatment. 2-way ANOVA: genotype [ $F_{1,162}=1.659$ ,  $P=0.200$ ], treatment [ $F_{2,162}=1.373$ ,  $P=0.256$ ], genotype x treatment [ $F_{2,162}=0.883$ ,  $P=0.415$ ]. **(C)** The percentage of time spent exploring the two objects was not statistically different across groups. 2-way ANOVA: genotype [ $F_{1,324}=0.000$ ,  $P=1.000$ ], treatment [ $F_{5,324}=2.334$ ,  $P=0.042$ ], genotype x treatment [ $F_{5,324}=1.724$ ,  $P=0.129$ ]. In all panels, the numbers in parentheses indicate numbers of animals per group.

## Supplemental Figure 7

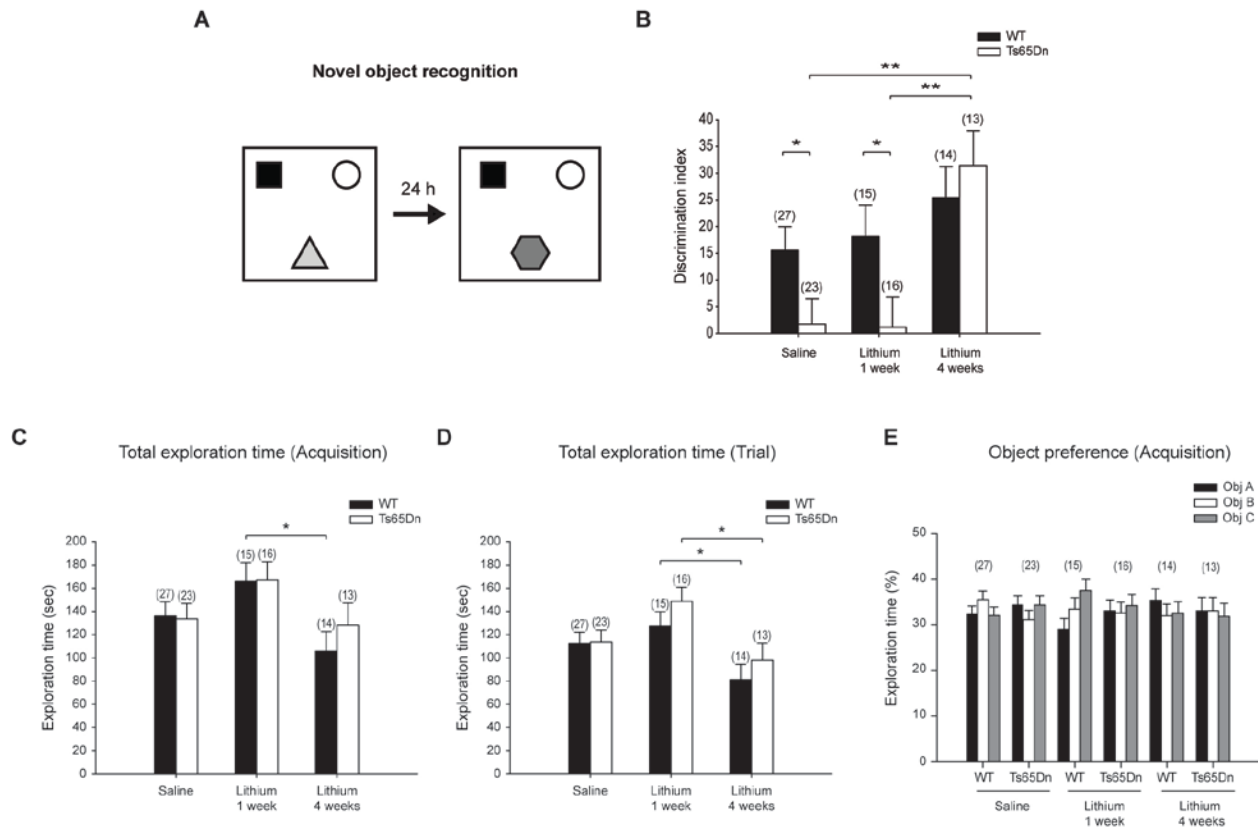

**Supplemental Figure 7. - Lithium Treatment restores novel object recognition in Ts65Dn mice. (A)** Schematic representation of the Novel object recognition (NOR) test. Ts65Dn mice and WT littermates were fed with either normal or lithium-containing diet for 1 or 4 weeks and then tested in the NOR test. **(B)** Lithium administration for 4 weeks, but not for 1 week, restored novelty discrimination in Ts65Dn mice. 2-way ANOVA: genotype [ $F_{1,102}=3.322$ ,  $P=0.071$ ], treatment [ $F_{2,102}=7.311$ ,  $P=0.001$ ], genotype x treatment [ $F_{2,102}=2.198$ ,  $P=0.116$ ]. **(C, D)** The total exploration time during the acquisition (C) and trial phases (D) was similar in saline-treated Ts65Dn and WT mice. Total exploration time was slightly increased during both phases after 1 week of lithium treatment in both Ts65Dn and WT littermates, but was unchanged after 4 weeks of treatment. Acquisition phase 2-way ANOVA: genotype [ $F_{1,95}=0.293$ ,  $P=0.590$ ], treatment [ $F_{2,95}=4.474$ ,  $P=0.014$ ], genotype x treatment [ $F_{2,95}=0.334$ ,  $P=0.717$ ]. \* $p<0.05$ , Tukey *post hoc* test. Trial phase 2-way ANOVA: genotype [ $F_{1,95}=1.710$ ,  $P=0.194$ ], treatment [ $F_{2,95}=6.705$ ,  $P=0.002$ ], genotype x treatment [ $F_{2,95}=0.469$ ,  $P=0.627$ ]. \* $p<0.05$ , Tukey *post hoc* test. **(E)** The percentage of time spent exploring the three objects was not statistically different across groups. 2-way ANOVA: genotype [ $F_{1,300}<0.001$ ,  $P=1.000$ ], treatment [ $F_{8,300}=0.563$ ,  $P=0.808$ ], genotype x treatment [ $F_{8,300}=0.895$ ,  $P=0.521$ ]. In all panels, the numbers in parentheses indicate numbers of animals per group.

## Supplemental Figure 8

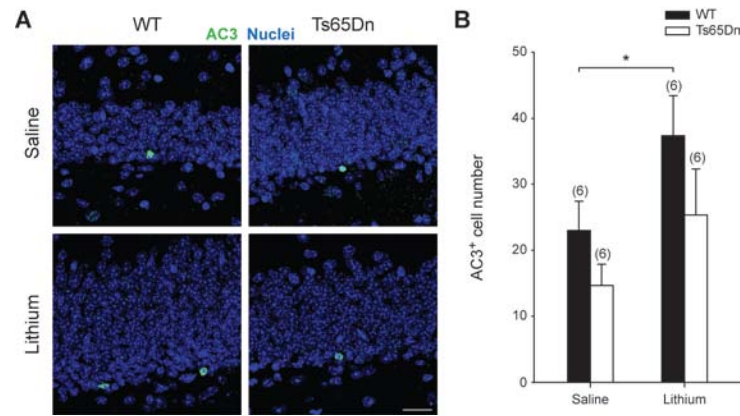

**Supplemental Figure 8. - Apoptotic cell death was not altered in saline- and lithium-treated Ts65Dn mice (A-B).** 5-6 month old Ts65Dn mice and WT littermates were fed with either lithium-containing or normal diet for 4 weeks. Apoptotic cells were identified by immunoreactivity for active Caspase-3 (AC3). **(A)** Representative confocal z-stack maximal projection images showing AC3 immunostaining (green). Nuclei are counterstained with Hoechst-33342 (blue). Scale bar, 25  $\mu$ m. **(B)** Quantification of AC3<sup>+</sup> apoptotic cells. The number of AC3<sup>+</sup> cells was similar in saline-treated WT and Ts65Dn mice. AC3<sup>+</sup> cells were significantly increased in WT, but not in Ts65Dn mice upon lithium treatment. 2-way ANOVA: genotype [ $F_{1,20}=4.286$ ,  $P=0.052$ ], treatment [ $F_{1,20}=6.299$ ,  $P=0.021$ ], genotype x treatment [ $F_{1,20}=0.225$ ,  $P=0.640$ ]. \* $p<0.05$  Tukey *post hoc* test. The numbers in parentheses indicate numbers of animals per group
